# Supplementary material
Source: publisher figshare collection journal article supplement (https://acs.figshare.com/ndownloader/files/5102977)
Supplement: Supplementary file 1 [file 5102977]

_publ_contact_author		'Daniel G. Nocera'
_publ_contact_author_email	nocera@mit.edu


loop_
_publ_author_name			'J.L.Dempsey, A.J.Esswein, D.R.Manke,' 
					'J.Rosenthal, J.D.Soper, D.G.Nocera'
_journal_name_full		'Inorganic Chemistry'
_chemical_name_systematic 	'Au2(tfepm)3Cl2'
_chemical_name_common             ? 
_chemical_melting_point           ? 
_chemical_formula_moiety          ? 
_chemical_formula_sum 
 'C39 H54 Au2 Cl2 F36 O15 P6' 
_chemical_formula_weight          2097.48 
  
loop_ 
 _atom_type_symbol 
 _atom_type_description 
 _atom_type_scat_dispersion_real 
 _atom_type_scat_dispersion_imag 
 _atom_type_scat_source 
 'C'  'C'   0.0033   0.0016 
 'International Tables Vol C Tables 4.2.6.8 and 6.1.1.4' 
 'H'  'H'   0.0000   0.0000 
 'International Tables Vol C Tables 4.2.6.8 and 6.1.1.4' 
 'O'  'O'   0.0106   0.0060 
 'International Tables Vol C Tables 4.2.6.8 and 6.1.1.4' 
 'F'  'F'   0.0171   0.0103 
 'International Tables Vol C Tables 4.2.6.8 and 6.1.1.4' 
 'P'  'P'   0.1023   0.0942 
 'International Tables Vol C Tables 4.2.6.8 and 6.1.1.4' 
 'Cl'  'Cl'   0.1484   0.1585 
 'International Tables Vol C Tables 4.2.6.8 and 6.1.1.4' 
 'Au'  'Au'  -2.0133   8.8022 
 'International Tables Vol C Tables 4.2.6.8 and 6.1.1.4' 
  
_symmetry_cell_setting            Monoclinic 
_symmetry_space_group_name_H-M    P2(1)/n 
  
loop_ 
 _symmetry_equiv_pos_as_xyz 
 'x, y, z' 
 '-x+1/2, y+1/2, -z+1/2' 
 '-x, -y, -z' 
 'x-1/2, -y-1/2, z-1/2' 
  
_cell_length_a                    17.378(6) 
_cell_length_b                    15.932(5) 
_cell_length_c                    26.895(8) 
_cell_angle_alpha                 90.00 
_cell_angle_beta                  108.438(6) 
_cell_angle_gamma                 90.00 
_cell_volume                      7064(4) 
_cell_formula_units_Z             4 
_cell_measurement_temperature     100(2) 
_cell_measurement_reflns_used     ? 
_cell_measurement_theta_min       ? 
_cell_measurement_theta_max       ? 
  
_exptl_crystal_description        block 
_exptl_crystal_colour             colorless 
_exptl_crystal_size_max           0.20 
_exptl_crystal_size_mid           0.13 
_exptl_crystal_size_min           0.06 
_exptl_crystal_density_meas       0 
_exptl_crystal_density_diffrn     1.972 
_exptl_crystal_density_method     'not measured' 
_exptl_crystal_F_000              4056 
_exptl_absorpt_coefficient_mu     4.509 
_exptl_absorpt_correction_type    'empirical'
_exptl_absorpt_correction_T_min   ? 
_exptl_absorpt_correction_T_max   ? 
_exptl_absorpt_process_details    'SADABS'
  
_exptl_special_details 
; 
 ? 
; 
  
_diffrn_ambient_temperature       100(2) 
_diffrn_radiation_wavelength      0.71073 
_diffrn_radiation_type            MoK\a 
_diffrn_radiation_source          'fine-focus sealed tube' 
_diffrn_radiation_monochromator   graphite 
_diffrn_measurement_device_type   'CCD area detector' 
_diffrn_measurement_method        'phi and omega scans' 
_diffrn_detector_area_resol_mean  ? 
_diffrn_standards_number          ? 
_diffrn_standards_interval_count  ? 
_diffrn_standards_interval_time   ? 
_diffrn_standards_decay_%         ? 
_diffrn_reflns_number             36587 
_diffrn_reflns_av_R_equivalents   0.0279 
_diffrn_reflns_av_sigmaI/netI     0.0248 
_diffrn_reflns_limit_h_min        -13 
_diffrn_reflns_limit_h_max        19 
_diffrn_reflns_limit_k_min        -17 
_diffrn_reflns_limit_k_max        17 
_diffrn_reflns_limit_l_min        -29 
_diffrn_reflns_limit_l_max        29 
_diffrn_reflns_theta_min          1.24 
_diffrn_reflns_theta_max          23.05 
_reflns_number_total              9827 
_reflns_number_gt                 9356 
_reflns_threshold_expression      >2sigma(I) 
  
_computing_data_collection        'Bruker SMART' 
_computing_cell_refinement        'Bruker SMART' 
_computing_data_reduction         'Bruker SAINT' 
_computing_structure_solution     'SHELXS-97 (Sheldrick, 1990)' 
_computing_structure_refinement   'SHELXL-97 (Sheldrick, 1997)' 
_computing_molecular_graphics     'Bruker SHELXTL' 
_computing_publication_material   'Bruker SHELXTL' 
  
_refine_special_details 
; 
 Refinement of F^2^ against ALL reflections.  The weighted R-factor wR and 
 goodness of fit S are based on F^2^, conventional R-factors R are based 
 on F, with F set to zero for negative F^2^. The threshold expression of 
 F^2^ > 2sigma(F^2^) is used only for calculating R-factors(gt) etc. and is 
 not relevant to the choice of reflections for refinement.  R-factors based 
 on F^2^ are statistically about twice as large as those based on F, and R- 
 factors based on ALL data will be even larger. 
; 
  
_refine_ls_structure_factor_coef  Fsqd 
_refine_ls_matrix_type            full 
_refine_ls_weighting_scheme       calc 
_refine_ls_weighting_details 
 'calc w=1/[\s^2^(Fo^2^)+(0.0252P)^2^+7.3695P] where P=(Fo^2^+2Fc^2^)/3' 
_atom_sites_solution_primary      direct 
_atom_sites_solution_secondary    difmap 
_atom_sites_solution_hydrogens    geom 
_refine_ls_hydrogen_treatment     mixed 
_refine_ls_extinction_method      none 
_refine_ls_extinction_coef        ? 
_refine_ls_number_reflns          9827 
_refine_ls_number_parameters      901 
_refine_ls_number_restraints      0 
_refine_ls_R_factor_all           0.0225 
_refine_ls_R_factor_gt            0.0209 
_refine_ls_wR_factor_ref          0.0540 
_refine_ls_wR_factor_gt           0.0534 
_refine_ls_goodness_of_fit_ref    1.152 
_refine_ls_restrained_S_all       1.152 
_refine_ls_shift/su_max           0.003 
_refine_ls_shift/su_mean          0.000 
  
loop_ 
 _atom_site_label 
 _atom_site_type_symbol 
 _atom_site_fract_x 
 _atom_site_fract_y 
 _atom_site_fract_z 
 _atom_site_U_iso_or_equiv 
 _atom_site_adp_type 
 _atom_site_occupancy 
 _atom_site_symmetry_multiplicity 
 _atom_site_calc_flag 
 _atom_site_refinement_flags 
 _atom_site_disorder_assembly 
 _atom_site_disorder_group 
Au1 Au 0.956765(7) 0.094247(8) 0.150621(5) 0.01096(5) Uani 1 1 d . . . 
Au2 Au 0.883283(8) 0.254948(8) 0.213901(5) 0.01160(5) Uani 1 1 d . . . 
P1 P 0.84585(5) 0.02862(5) 0.16675(4) 0.01156(19) Uani 1 1 d . . . 
P2 P 0.81330(5) 0.15223(6) 0.24543(4) 0.01204(19) Uani 1 1 d . . . 
P3 P 0.91341(5) 0.18810(6) 0.07842(3) 0.01159(19) Uani 1 1 d . . . 
P4 P 0.81473(5) 0.30546(5) 0.12745(3) 0.01180(19) Uani 1 1 d . . . 
P5 P 1.08623(5) 0.11957(6) 0.21102(4) 0.01217(19) Uani 1 1 d . . . 
P6 P 1.02420(5) 0.28124(6) 0.24889(4) 0.0141(2) Uani 1 1 d . . . 
Cl1 Cl 1.03483(5) -0.03116(5) 0.11357(3) 0.01688(19) Uani 1 1 d . . . 
Cl2 Cl 0.82415(5) 0.39626(5) 0.26276(3) 0.01660(19) Uani 1 1 d . . . 
O1 O 0.83903(14) -0.07251(14) 0.16447(9) 0.0154(5) Uani 1 1 d . . . 
O2 O 0.76297(13) 0.06156(15) 0.12329(9) 0.0157(5) Uani 1 1 d . . . 
O3 O 0.82835(15) 0.14184(15) 0.30797(9) 0.0186(6) Uani 1 1 d . . . 
O4 O 0.71552(13) 0.16646(15) 0.22126(9) 0.0144(5) Uani 1 1 d . . . 
O5 O 0.88816(14) 0.15671(15) 0.01809(9) 0.0160(5) Uani 1 1 d . . . 
O6 O 0.98140(14) 0.26039(15) 0.08332(9) 0.0158(5) Uani 1 1 d . . . 
O7 O 0.71707(14) 0.31591(15) 0.10873(9) 0.0183(6) Uani 1 1 d . . . 
O8 O 0.84807(15) 0.39365(14) 0.11161(9) 0.0176(6) Uani 1 1 d . . . 
O9 O 1.15284(14) 0.16575(15) 0.18948(9) 0.0174(6) Uani 1 1 d . . . 
O10 O 1.13908(13) 0.04066(14) 0.24172(9) 0.0157(5) Uani 1 1 d . . . 
O11 O 1.05095(14) 0.33699(15) 0.20676(10) 0.0206(6) Uani 1 1 d . . . 
O12 O 1.06250(15) 0.32760(15) 0.30457(10) 0.0233(6) Uani 1 1 d . . . 
C1 C 0.8300(2) 0.0428(2) 0.23048(13) 0.0134(8) Uani 1 1 d . . . 
H1A H 0.7825 0.0091 0.2311 0.016 Uiso 1 1 calc R . . 
H1B H 0.8780 0.0210 0.2583 0.016 Uiso 1 1 calc R . . 
C2 C 0.8185(2) 0.2440(2) 0.07148(14) 0.0133(8) Uani 1 1 d . . . 
H2A H 0.8075 0.2819 0.0409 0.016 Uiso 1 1 calc R . . 
H2B H 0.7740 0.2022 0.0635 0.016 Uiso 1 1 calc R . . 
C3 C 1.0941(2) 0.1922(2) 0.26503(14) 0.0144(8) Uani 1 1 d . . . 
H3A H 1.0845 0.1606 0.2942 0.017 Uiso 1 1 calc R . . 
H3B H 1.1503 0.2141 0.2778 0.017 Uiso 1 1 calc R . . 
C4 C 0.8538(2) -0.1171(2) 0.12097(14) 0.0166(8) Uani 1 1 d . . . 
H4A H 0.8933 -0.0859 0.1083 0.020 Uiso 1 1 calc R . . 
H4B H 0.8027 -0.1233 0.0916 0.020 Uiso 1 1 calc R . . 
C5 C 0.8873(2) -0.2019(2) 0.14164(15) 0.0216(9) Uani 1 1 d . . . 
C6 C 0.6841(2) 0.0237(2) 0.11539(15) 0.0187(8) Uani 1 1 d . . . 
H6A H 0.6658 0.0338 0.1462 0.022 Uiso 1 1 calc R . . 
H6B H 0.6866 -0.0376 0.1101 0.022 Uiso 1 1 calc R . . 
C7 C 0.6270(2) 0.0644(3) 0.06745(16) 0.0245(9) Uani 1 1 d . . . 
C8 C 0.8575(2) 0.2113(2) 0.34389(14) 0.0205(8) Uani 1 1 d . . . 
H8A H 0.8205 0.2209 0.3648 0.025 Uiso 1 1 calc R . . 
H8B H 0.8595 0.2632 0.3241 0.025 Uiso 1 1 calc R . . 
C9 C 0.9411(2) 0.1896(3) 0.37955(15) 0.0263(9) Uani 1 1 d . . . 
C10 C 0.6584(2) 0.1253(2) 0.24251(15) 0.0174(8) Uani 1 1 d . . . 
H10A H 0.6711 0.1387 0.2802 0.021 Uiso 1 1 calc R . . 
H10B H 0.6611 0.0636 0.2387 0.021 Uiso 1 1 calc R . . 
C11 C 0.5756(2) 0.1572(3) 0.21217(15) 0.0234(9) Uani 1 1 d . . . 
C12 C 0.9209(2) 0.0800(2) 0.00360(14) 0.0160(8) Uani 1 1 d . . . 
H12A H 0.9657 0.0585 0.0337 0.019 Uiso 1 1 calc R . . 
H12B H 0.9424 0.0910 -0.0258 0.019 Uiso 1 1 calc R . . 
C13 C 0.8529(2) 0.0164(2) -0.01266(14) 0.0190(8) Uani 1 1 d . . . 
C14 C 0.9724(2) 0.3262(2) 0.04469(15) 0.0211(9) Uani 1 1 d . . . 
H14A H 0.9709 0.3818 0.0608 0.025 Uiso 1 1 calc R . . 
H14B H 0.9213 0.3185 0.0155 0.025 Uiso 1 1 calc R . . 
C15 C 1.0445(3) 0.3211(3) 0.02457(17) 0.0336(11) Uani 1 1 d . . . 
C16 C 0.6696(2) 0.3351(2) 0.14271(14) 0.0185(8) Uani 1 1 d . . . 
H16A H 0.7052 0.3383 0.1796 0.022 Uiso 1 1 calc R . . 
H16B H 0.6286 0.2907 0.1400 0.022 Uiso 1 1 calc R . . 
C17 C 0.6287(2) 0.4180(3) 0.12576(16) 0.0255(9) Uani 1 1 d . . . 
C18 C 0.8839(2) 0.4553(2) 0.15193(14) 0.0160(8) Uani 1 1 d . . . 
H18A H 0.9396 0.4382 0.1726 0.019 Uiso 1 1 calc R . . 
H18B H 0.8512 0.4605 0.1760 0.019 Uiso 1 1 calc R . . 
C19 C 0.8856(2) 0.5378(2) 0.12489(15) 0.0199(9) Uani 1 1 d . . . 
C20 C 1.1665(2) 0.1396(3) 0.14113(15) 0.0217(9) Uani 1 1 d . . . 
H20A H 1.1241 0.1631 0.1104 0.026 Uiso 1 1 calc R . . 
H20B H 1.1650 0.0776 0.1383 0.026 Uiso 1 1 calc R . . 
C21 C 1.2492(2) 0.1723(3) 0.14312(16) 0.0285(10) Uani 1 1 d . . . 
C22 C 1.1065(2) -0.0420(2) 0.24393(14) 0.0171(8) Uani 1 1 d . . . 
H22A H 1.1453 -0.0851 0.2402 0.021 Uiso 1 1 calc R . . 
H22B H 1.0551 -0.0491 0.2149 0.021 Uiso 1 1 calc R . . 
C23 C 1.0913(2) -0.0524(2) 0.29608(15) 0.0238(9) Uani 1 1 d . . . 
C24 C 1.1342(2) 0.3654(3) 0.21486(19) 0.0312(10) Uani 1 1 d . . . 
H24A H 1.1608 0.3294 0.1951 0.037 Uiso 1 1 calc R . . 
H24B H 1.1662 0.3627 0.2525 0.037 Uiso 1 1 calc R . . 
C25 C 1.1289(2) 0.4535(2) 0.19567(16) 0.0248(9) Uani 1 1 d . . . 
C26 C 1.0291(2) 0.4037(2) 0.31902(16) 0.0246(9) Uani 1 1 d . . . 
H26A H 0.9810 0.3908 0.3299 0.030 Uiso 1 1 calc R . . 
H26B H 1.0128 0.4434 0.2892 0.030 Uiso 1 1 calc R . . 
C27 C 1.0963(2) 0.4408(3) 0.36434(16) 0.0277(10) Uani 1 1 d . . . 
F1 F 0.95688(13) -0.19816(14) 0.18163(9) 0.0304(5) Uani 1 1 d . . . 
F2 F 0.90168(15) -0.24650(13) 0.10235(10) 0.0317(6) Uani 1 1 d . . . 
F3 F 0.83400(14) -0.24745(12) 0.15844(9) 0.0271(5) Uani 1 1 d . . . 
F4 F 0.64782(14) 0.05116(17) 0.02419(9) 0.0375(6) Uani 1 1 d . . . 
F5 F 0.55070(12) 0.03523(15) 0.05862(9) 0.0338(6) Uani 1 1 d . . . 
F6 F 0.62487(13) 0.14899(14) 0.07324(10) 0.0329(6) Uani 1 1 d . . . 
F7 F 0.94101(14) 0.12571(16) 0.41216(9) 0.0370(6) Uani 1 1 d . . . 
F8 F 0.97506(17) 0.25573(17) 0.40934(10) 0.0474(7) Uani 1 1 d . . . 
F9 F 0.99149(14) 0.16689(18) 0.35243(9) 0.0432(7) Uani 1 1 d . . . 
F10 F 0.55650(13) 0.14145(16) 0.16017(9) 0.0348(6) Uani 1 1 d . . . 
F11 F 0.56787(14) 0.24023(15) 0.21678(10) 0.0355(6) Uani 1 1 d . . . 
F12 F 0.51815(12) 0.11951(16) 0.22875(9) 0.0356(6) Uani 1 1 d . . . 
F13 F 0.81664(12) 0.00485(14) 0.02479(8) 0.0256(5) Uani 1 1 d . . . 
F14 F 0.88165(13) -0.05910(13) -0.02136(9) 0.0262(5) Uani 1 1 d . . . 
F15 F 0.79385(12) 0.03804(14) -0.05667(8) 0.0283(5) Uani 1 1 d . . . 
F16 F 1.04976(17) 0.24657(18) 0.00264(11) 0.0500(8) Uani 1 1 d . . . 
F17 F 1.11565(14) 0.33264(18) 0.06324(11) 0.0476(7) Uani 1 1 d . . . 
F18 F 1.03851(17) 0.3811(2) -0.01150(12) 0.0617(9) Uani 1 1 d . . . 
F19 F 0.58180(14) 0.43814(16) 0.15587(10) 0.0408(6) Uani 1 1 d . . . 
F20 F 0.58014(15) 0.41805(16) 0.07578(9) 0.0395(6) Uani 1 1 d . . . 
F21 F 0.68263(15) 0.48074(14) 0.13063(11) 0.0430(7) Uani 1 1 d . . . 
F22 F 0.92764(13) 0.59425(12) 0.16042(9) 0.0259(5) Uani 1 1 d . . . 
F23 F 0.81124(14) 0.56969(14) 0.10178(10) 0.0393(6) Uani 1 1 d . . . 
F24 F 0.92251(16) 0.53214(14) 0.08787(9) 0.0368(6) Uani 1 1 d . . . 
F25 F 1.25518(16) 0.25631(15) 0.15105(11) 0.0415(7) Uani 1 1 d . . . 
F26 F 1.26240(14) 0.15657(17) 0.09717(9) 0.0420(7) Uani 1 1 d . . . 
F27 F 1.30960(13) 0.13751(17) 0.18093(10) 0.0412(6) Uani 1 1 d . . . 
F28 F 1.03714(14) 0.00482(15) 0.30200(10) 0.0364(6) Uani 1 1 d . . . 
F29 F 1.06106(15) -0.12915(15) 0.29942(10) 0.0401(6) Uani 1 1 d . . . 
F30 F 1.15896(14) -0.04318(17) 0.33761(9) 0.0396(6) Uani 1 1 d . . . 
F31 F 1.20329(13) 0.48379(15) 0.20064(11) 0.0443(7) Uani 1 1 d . . . 
F32 F 1.09427(15) 0.50470(15) 0.22215(11) 0.0424(7) Uani 1 1 d . . . 
F33 F 1.08411(15) 0.46133(16) 0.14496(10) 0.0423(7) Uani 1 1 d . . . 
F34 F 1.12375(16) 0.38770(16) 0.40473(9) 0.0415(6) Uani 1 1 d . . . 
F35 F 1.16147(13) 0.46165(15) 0.34952(10) 0.0364(6) Uani 1 1 d . . . 
F36 F 1.07000(16) 0.51073(16) 0.38152(11) 0.0496(7) Uani 1 1 d . . . 
O1S O 0.21684(17) 0.63729(18) 0.03598(11) 0.0337(7) Uani 1 1 d . . . 
O2S O 0.21783(16) 0.77939(19) 0.19820(11) 0.0320(7) Uani 1 1 d . . . 
O3S O 0.67468(19) 0.7959(2) 1.04461(12) 0.0447(8) Uani 1 1 d . . . 
C1S C 0.3014(3) 0.6537(4) 0.0626(2) 0.0520(14) Uani 1 1 d . . . 
H1S1 H 0.3133 0.6506 0.1011 0.062 Uiso 1 1 calc R . . 
H1S2 H 0.3168 0.7100 0.0534 0.062 Uiso 1 1 calc R . . 
C2S C 0.3466(4) 0.5862(5) 0.0440(3) 0.097(3) Uani 1 1 d . . . 
H2S1 H 0.3647 0.6068 0.0148 0.116 Uiso 1 1 calc R . . 
H2S2 H 0.3946 0.5671 0.0729 0.116 Uiso 1 1 calc R . . 
C3S C 0.2858(4) 0.5165(5) 0.0261(3) 0.096(3) Uani 1 1 d . . . 
H3S1 H 0.3054 0.4648 0.0466 0.115 Uiso 1 1 calc R . . 
H3S2 H 0.2759 0.5042 -0.0115 0.115 Uiso 1 1 calc R . . 
C4S C 0.2094(3) 0.5483(3) 0.0351(2) 0.0520(14) Uani 1 1 d . . . 
H4S1 H 0.1608 0.5301 0.0065 0.062 Uiso 1 1 calc R . . 
H4S2 H 0.2055 0.5273 0.0689 0.062 Uiso 1 1 calc R . . 
C5S C 0.2009(2) 0.8097(3) 0.14457(16) 0.0265(9) Uani 1 1 d . . . 
H5S1 H 0.2478 0.7992 0.1321 0.032 Uiso 1 1 calc R . . 
H5S2 H 0.1897 0.8708 0.1428 0.032 Uiso 1 1 calc R . . 
C6S C 0.1267(3) 0.7617(2) 0.11117(16) 0.0253(9) Uani 1 1 d . . . 
H6S1 H 0.1299 0.7508 0.0756 0.030 Uiso 1 1 calc R . . 
H6S2 H 0.0761 0.7927 0.1081 0.030 Uiso 1 1 calc R . . 
C7S C 0.1312(3) 0.6800(3) 0.14173(17) 0.0311(10) Uani 1 1 d . . . 
H7S1 H 0.0771 0.6536 0.1340 0.037 Uiso 1 1 calc R . . 
H7S2 H 0.1692 0.6396 0.1341 0.037 Uiso 1 1 calc R . . 
C8S C 0.1625(2) 0.7111(3) 0.19801(16) 0.0313(10) Uani 1 1 d . . . 
H8S1 H 0.1171 0.7311 0.2097 0.038 Uiso 1 1 calc R . . 
H8S2 H 0.1912 0.6655 0.2217 0.038 Uiso 1 1 calc R . . 
C9S C 0.7032(3) 0.7336(4) 1.0168(2) 0.0567(15) Uani 1 1 d . . . 
H9S1 H 0.7274 0.6862 1.0403 0.068 Uiso 1 1 calc R . . 
H9S2 H 0.7451 0.7576 1.0032 0.068 Uiso 1 1 calc R . . 
C10S C 0.6315(3) 0.7035(3) 0.9719(2) 0.0523(14) Uani 1 1 d . . . 
H10C H 0.6104 0.6496 0.9806 0.063 Uiso 1 1 calc R . . 
H10D H 0.6466 0.6961 0.9396 0.063 Uiso 1 1 calc R . . 
C11S C 0.5686(4) 0.7741(3) 0.9651(2) 0.0633(17) Uani 1 1 d . . . 
H11C H 0.5524 0.7970 0.9291 0.076 Uiso 1 1 calc R . . 
H11D H 0.5197 0.7534 0.9726 0.076 Uiso 1 1 calc R . . 
C12S C 0.6122(3) 0.8404(3) 1.0049(2) 0.0517(14) Uani 1 1 d . . . 
H12C H 0.6363 0.8838 0.9881 0.062 Uiso 1 1 calc R . . 
H12D H 0.5740 0.8677 1.0205 0.062 Uiso 1 1 calc R . . 
  
loop_ 
 _atom_site_aniso_label 
 _atom_site_aniso_U_11 
 _atom_site_aniso_U_22 
 _atom_site_aniso_U_33 
 _atom_site_aniso_U_23 
 _atom_site_aniso_U_13 
 _atom_site_aniso_U_12 
Au1 0.00795(8) 0.01230(8) 0.01228(8) 0.00030(5) 0.00269(6) 0.00036(5) 
Au2 0.00864(8) 0.01250(8) 0.01347(8) 0.00041(5) 0.00322(6) -0.00066(5) 
P1 0.0086(4) 0.0124(5) 0.0133(5) 0.0002(4) 0.0029(4) -0.0002(4) 
P2 0.0095(4) 0.0144(5) 0.0122(5) 0.0008(4) 0.0034(4) -0.0002(4) 
P3 0.0102(4) 0.0126(5) 0.0117(5) 0.0009(4) 0.0031(4) 0.0005(4) 
P4 0.0104(5) 0.0121(5) 0.0129(5) 0.0006(4) 0.0036(4) 0.0018(4) 
P5 0.0075(4) 0.0138(5) 0.0144(5) 0.0007(4) 0.0023(4) 0.0005(4) 
P6 0.0095(4) 0.0139(5) 0.0167(5) -0.0019(4) 0.0010(4) -0.0017(4) 
Cl1 0.0162(4) 0.0173(5) 0.0183(5) -0.0006(4) 0.0070(4) 0.0039(4) 
Cl2 0.0145(4) 0.0167(4) 0.0189(5) -0.0015(4) 0.0059(4) 0.0026(4) 
O1 0.0179(13) 0.0126(12) 0.0173(13) -0.0016(11) 0.0080(11) -0.0009(10) 
O2 0.0087(12) 0.0197(13) 0.0163(13) 0.0029(11) 0.0003(10) -0.0018(10) 
O3 0.0224(14) 0.0203(14) 0.0133(13) 0.0003(11) 0.0058(11) -0.0036(11) 
O4 0.0103(12) 0.0178(13) 0.0165(13) 0.0021(11) 0.0061(11) 0.0005(10) 
O5 0.0177(13) 0.0166(13) 0.0126(13) -0.0019(11) 0.0033(11) 0.0046(10) 
O6 0.0121(13) 0.0194(13) 0.0144(13) 0.0033(11) 0.0021(11) -0.0035(10) 
O7 0.0115(13) 0.0260(14) 0.0166(14) -0.0012(11) 0.0034(11) 0.0064(11) 
O8 0.0250(14) 0.0112(13) 0.0161(14) -0.0014(11) 0.0059(12) -0.0028(11) 
O9 0.0143(13) 0.0223(14) 0.0167(13) -0.0025(11) 0.0065(11) -0.0066(11) 
O10 0.0103(12) 0.0149(13) 0.0192(13) 0.0027(11) 0.0007(11) 0.0016(10) 
O11 0.0095(12) 0.0209(14) 0.0292(15) 0.0086(12) 0.0030(11) -0.0019(11) 
O12 0.0181(14) 0.0183(14) 0.0268(15) -0.0109(12) -0.0021(12) 0.0038(11) 
C1 0.0104(17) 0.0181(19) 0.0125(18) 0.0013(15) 0.0048(15) 0.0008(15) 
C2 0.0128(19) 0.0129(18) 0.0136(19) 0.0008(15) 0.0035(16) 0.0007(14) 
C3 0.0091(17) 0.0162(19) 0.0149(19) 0.0000(16) -0.0006(15) -0.0017(15) 
C4 0.0194(19) 0.0117(18) 0.020(2) -0.0010(16) 0.0078(17) 0.0006(15) 
C5 0.023(2) 0.020(2) 0.025(2) 0.0009(17) 0.0112(19) 0.0008(17) 
C6 0.0077(18) 0.023(2) 0.023(2) 0.0012(17) 0.0019(16) -0.0040(16) 
C7 0.011(2) 0.031(2) 0.031(2) -0.0028(19) 0.0062(18) 0.0007(17) 
C8 0.025(2) 0.019(2) 0.016(2) -0.0058(17) 0.0051(17) -0.0017(17) 
C9 0.026(2) 0.035(2) 0.018(2) -0.0048(19) 0.0062(18) -0.0081(19) 
C10 0.0150(19) 0.0180(19) 0.023(2) -0.0002(16) 0.0109(17) -0.0033(16) 
C11 0.016(2) 0.033(2) 0.024(2) 0.0021(18) 0.0099(18) -0.0012(18) 
C12 0.0167(19) 0.0178(19) 0.0133(19) -0.0029(16) 0.0045(16) 0.0054(15) 
C13 0.0188(19) 0.021(2) 0.017(2) -0.0008(16) 0.0041(17) 0.0038(16) 
C14 0.020(2) 0.017(2) 0.025(2) 0.0061(17) 0.0057(17) -0.0025(16) 
C15 0.032(3) 0.044(3) 0.028(2) 0.013(2) 0.013(2) -0.008(2) 
C16 0.0124(18) 0.026(2) 0.018(2) -0.0012(17) 0.0067(16) 0.0034(16) 
C17 0.018(2) 0.031(2) 0.030(2) -0.0082(19) 0.0100(19) 0.0025(18) 
C18 0.0146(18) 0.0147(19) 0.0166(19) -0.0019(16) 0.0020(16) -0.0013(15) 
C19 0.022(2) 0.017(2) 0.020(2) -0.0019(17) 0.0050(18) -0.0010(17) 
C20 0.022(2) 0.028(2) 0.018(2) -0.0020(17) 0.0114(17) -0.0057(17) 
C21 0.023(2) 0.038(3) 0.027(2) -0.007(2) 0.011(2) -0.0067(19) 
C22 0.0132(18) 0.0145(19) 0.020(2) 0.0012(16) 0.0006(16) 0.0018(15) 
C23 0.020(2) 0.024(2) 0.025(2) 0.0070(18) 0.0043(18) -0.0028(18) 
C24 0.0074(19) 0.029(2) 0.056(3) 0.012(2) 0.0077(19) -0.0030(17) 
C25 0.0086(19) 0.026(2) 0.037(3) 0.0073(19) 0.0035(18) -0.0060(17) 
C26 0.015(2) 0.024(2) 0.030(2) -0.0128(18) 0.0016(18) 0.0014(16) 
C27 0.029(2) 0.022(2) 0.031(2) -0.009(2) 0.007(2) 0.0023(19) 
F1 0.0221(12) 0.0330(13) 0.0344(14) 0.0090(11) 0.0066(11) 0.0082(10) 
F2 0.0469(15) 0.0188(12) 0.0388(15) -0.0027(10) 0.0268(13) 0.0061(10) 
F3 0.0299(13) 0.0169(12) 0.0403(14) 0.0056(10) 0.0193(12) -0.0017(9) 
F4 0.0289(13) 0.0620(17) 0.0187(12) -0.0040(12) 0.0035(11) 0.0047(12) 
F5 0.0114(11) 0.0454(15) 0.0380(14) -0.0027(12) -0.0015(10) -0.0024(10) 
F6 0.0247(12) 0.0245(13) 0.0464(15) 0.0053(11) 0.0068(11) 0.0078(10) 
F7 0.0342(14) 0.0486(15) 0.0228(13) 0.0149(12) 0.0014(11) 0.0013(12) 
F8 0.0452(17) 0.0569(18) 0.0319(15) -0.0134(13) 0.0007(13) -0.0255(13) 
F9 0.0226(13) 0.079(2) 0.0297(14) 0.0046(13) 0.0105(11) 0.0082(13) 
F10 0.0191(12) 0.0635(17) 0.0197(13) -0.0009(12) 0.0034(10) -0.0026(11) 
F11 0.0276(13) 0.0367(15) 0.0456(16) 0.0100(12) 0.0165(12) 0.0181(11) 
F12 0.0136(11) 0.0592(16) 0.0359(14) 0.0097(13) 0.0106(11) -0.0046(11) 
F13 0.0230(11) 0.0309(13) 0.0267(12) 0.0009(10) 0.0136(10) -0.0031(10) 
F14 0.0271(12) 0.0192(12) 0.0315(13) -0.0064(10) 0.0080(10) 0.0017(10) 
F15 0.0190(11) 0.0377(14) 0.0192(12) 0.0012(10) -0.0068(10) 0.0005(10) 
F16 0.0484(17) 0.068(2) 0.0448(17) -0.0067(14) 0.0304(15) 0.0062(14) 
F17 0.0208(13) 0.0680(19) 0.0510(17) 0.0133(14) 0.0070(13) -0.0134(13) 
F18 0.0541(18) 0.080(2) 0.0570(19) 0.0440(17) 0.0265(16) -0.0046(16) 
F19 0.0267(13) 0.0538(16) 0.0457(16) -0.0172(13) 0.0169(12) 0.0112(12) 
F20 0.0336(14) 0.0497(16) 0.0296(14) 0.0027(12) 0.0021(12) 0.0236(12) 
F21 0.0365(14) 0.0209(13) 0.0731(19) -0.0050(13) 0.0196(14) 0.0042(11) 
F22 0.0302(12) 0.0158(11) 0.0280(13) -0.0015(10) 0.0038(11) -0.0063(10) 
F23 0.0284(13) 0.0206(12) 0.0526(16) 0.0101(12) -0.0106(12) 0.0034(11) 
F24 0.0632(17) 0.0265(13) 0.0307(14) 0.0002(11) 0.0291(13) -0.0135(12) 
F25 0.0389(15) 0.0360(15) 0.0576(18) -0.0072(13) 0.0268(14) -0.0189(12) 
F26 0.0354(14) 0.0672(18) 0.0332(15) -0.0125(13) 0.0250(12) -0.0184(13) 
F27 0.0189(12) 0.0690(18) 0.0336(14) -0.0058(14) 0.0055(11) 0.0094(12) 
F28 0.0338(14) 0.0388(14) 0.0470(16) 0.0033(12) 0.0272(12) 0.0026(11) 
F29 0.0449(15) 0.0309(14) 0.0464(16) 0.0132(12) 0.0170(13) -0.0078(12) 
F30 0.0336(14) 0.0600(17) 0.0201(13) 0.0067(12) 0.0011(11) -0.0057(13) 
F31 0.0165(12) 0.0329(14) 0.079(2) 0.0209(14) 0.0094(13) -0.0093(11) 
F32 0.0391(15) 0.0256(13) 0.0648(18) -0.0122(13) 0.0196(14) -0.0074(11) 
F33 0.0372(14) 0.0477(16) 0.0361(15) 0.0138(12) 0.0031(12) -0.0150(12) 
F34 0.0460(16) 0.0458(15) 0.0254(14) -0.0043(12) 0.0010(12) -0.0006(13) 
F35 0.0215(12) 0.0355(14) 0.0457(15) -0.0072(12) 0.0014(11) -0.0082(11) 
F36 0.0477(16) 0.0408(16) 0.0515(17) -0.0299(14) 0.0033(14) 0.0096(13) 
O1S 0.0337(17) 0.0307(17) 0.0305(17) 0.0026(14) 0.0013(14) 0.0064(13) 
O2S 0.0208(15) 0.0408(17) 0.0252(16) 0.0070(14) -0.0056(13) -0.0075(13) 
O3S 0.0381(18) 0.057(2) 0.0305(18) 0.0018(16) -0.0014(15) 0.0017(16) 
C1S 0.039(3) 0.067(4) 0.041(3) -0.006(3) 0.000(2) -0.006(3) 
C2S 0.039(3) 0.181(8) 0.062(4) -0.047(5) 0.003(3) 0.016(4) 
C3S 0.091(5) 0.102(5) 0.060(4) -0.041(4) -0.028(4) 0.072(5) 
C4S 0.060(3) 0.039(3) 0.042(3) -0.002(2) -0.006(3) 0.005(3) 
C5S 0.023(2) 0.025(2) 0.031(2) 0.0064(19) 0.0078(19) 0.0019(18) 
C6S 0.030(2) 0.022(2) 0.020(2) 0.0013(17) 0.0030(19) 0.0035(18) 
C7S 0.028(2) 0.025(2) 0.037(3) 0.001(2) 0.005(2) -0.0030(19) 
C8S 0.025(2) 0.039(3) 0.030(2) 0.013(2) 0.0071(19) -0.003(2) 
C9S 0.047(3) 0.074(4) 0.043(3) 0.009(3) 0.005(3) 0.025(3) 
C10S 0.056(3) 0.041(3) 0.051(3) -0.005(3) 0.005(3) 0.011(3) 
C11S 0.061(4) 0.054(3) 0.051(3) -0.012(3) -0.016(3) 0.028(3) 
C12S 0.064(3) 0.041(3) 0.040(3) 0.004(2) 0.002(3) 0.012(3) 
  
_geom_special_details 
; 
 All esds (except the esd in the dihedral angle between two l.s. planes) 
 are estimated using the full covariance matrix.  The cell esds are taken 
 into account individually in the estimation of esds in distances, angles 
 and torsion angles; correlations between esds in cell parameters are only 
 used when they are defined by crystal symmetry.  An approximate (isotropic) 
 treatment of cell esds is used for estimating esds involving l.s. planes. 
; 
  
loop_ 
 _geom_bond_atom_site_label_1 
 _geom_bond_atom_site_label_2 
 _geom_bond_distance 
 _geom_bond_site_symmetry_2 
 _geom_bond_publ_flag 
Au1 P1 2.3507(10) . ? 
Au1 P5 2.3562(11) . ? 
Au1 P3 2.3767(10) . ? 
Au1 Cl1 2.7713(10) . ? 
Au2 P2 2.3514(10) . ? 
Au2 P6 2.3665(11) . ? 
Au2 P4 2.3918(11) . ? 
P1 O1 1.615(2) . ? 
P1 O2 1.628(2) . ? 
P1 C1 1.834(3) . ? 
P2 O3 1.627(3) . ? 
P2 O4 1.632(2) . ? 
P2 C1 1.832(4) . ? 
P3 O5 1.620(2) . ? 
P3 O6 1.625(2) . ? 
P3 C2 1.831(3) . ? 
P4 O7 1.619(2) . ? 
P4 O8 1.627(2) . ? 
P4 C2 1.815(4) . ? 
P5 O10 1.621(2) . ? 
P5 O9 1.625(2) . ? 
P5 C3 1.828(4) . ? 
P6 O12 1.613(3) . ? 
P6 O11 1.619(3) . ? 
P6 C3 1.828(4) . ? 
O1 C4 1.459(4) . ? 
O2 C6 1.450(4) . ? 
O3 C8 1.451(4) . ? 
O4 C10 1.449(4) . ? 
O5 C12 1.452(4) . ? 
O6 C14 1.449(4) . ? 
O7 C16 1.444(4) . ? 
O8 C18 1.450(4) . ? 
O9 C20 1.455(4) . ? 
O10 C22 1.442(4) . ? 
O11 C24 1.465(4) . ? 
O12 C26 1.450(4) . ? 
C4 C5 1.506(5) . ? 
C5 F1 1.342(4) . ? 
C5 F2 1.360(4) . ? 
C5 F3 1.361(4) . ? 
C6 C7 1.502(5) . ? 
C7 F4 1.340(5) . ? 
C7 F5 1.354(4) . ? 
C7 F6 1.358(5) . ? 
C8 C9 1.506(6) . ? 
C9 F8 1.342(5) . ? 
C9 F7 1.344(5) . ? 
C9 F9 1.354(5) . ? 
C10 C11 1.501(5) . ? 
C11 F11 1.339(5) . ? 
C11 F10 1.355(5) . ? 
C11 F12 1.357(4) . ? 
C12 C13 1.512(5) . ? 
C13 F15 1.343(4) . ? 
C13 F14 1.351(4) . ? 
C13 F13 1.359(4) . ? 
C14 C15 1.515(6) . ? 
C15 F16 1.341(5) . ? 
C15 F18 1.343(5) . ? 
C15 F17 1.353(5) . ? 
C16 C17 1.501(5) . ? 
C17 F20 1.342(5) . ? 
C17 F21 1.348(5) . ? 
C17 F19 1.356(4) . ? 
C18 C19 1.507(5) . ? 
C19 F23 1.345(4) . ? 
C19 F24 1.347(4) . ? 
C19 F22 1.347(4) . ? 
C20 C21 1.513(5) . ? 
C21 F27 1.330(5) . ? 
C21 F26 1.350(5) . ? 
C21 F25 1.355(5) . ? 
C22 C23 1.516(5) . ? 
C23 F29 1.346(4) . ? 
C23 F30 1.349(4) . ? 
C23 F28 1.356(5) . ? 
C24 C25 1.489(6) . ? 
C25 F32 1.343(5) . ? 
C25 F33 1.345(5) . ? 
C25 F31 1.347(4) . ? 
C26 C27 1.517(6) . ? 
C27 F34 1.340(5) . ? 
C27 F36 1.341(5) . ? 
C27 F35 1.355(5) . ? 
O1S C4S 1.423(6) . ? 
O1S C1S 1.441(6) . ? 
O2S C8S 1.451(5) . ? 
O2S C5S 1.460(5) . ? 
O3S C9S 1.423(6) . ? 
O3S C12S 1.445(6) . ? 
C1S C2S 1.507(8) . ? 
C2S C3S 1.503(10) . ? 
C3S C4S 1.511(8) . ? 
C5S C6S 1.523(6) . ? 
C6S C7S 1.527(6) . ? 
C7S C8S 1.520(6) . ? 
C9S C10S 1.512(7) . ? 
C10S C11S 1.539(7) . ? 
C11S C12S 1.523(7) . ? 
  
loop_ 
 _geom_angle_atom_site_label_1 
 _geom_angle_atom_site_label_2 
 _geom_angle_atom_site_label_3 
 _geom_angle 
 _geom_angle_site_symmetry_1 
 _geom_angle_site_symmetry_3 
 _geom_angle_publ_flag 
P1 Au1 P5 127.50(4) . . ? 
P1 Au1 P3 111.35(3) . . ? 
P5 Au1 P3 116.26(3) . . ? 
P1 Au1 Cl1 105.60(3) . . ? 
P5 Au1 Cl1 84.38(3) . . ? 
P3 Au1 Cl1 102.98(3) . . ? 
P2 Au2 P6 124.61(3) . . ? 
P2 Au2 P4 115.43(3) . . ? 
P6 Au2 P4 117.49(3) . . ? 
O1 P1 O2 104.87(13) . . ? 
O1 P1 C1 97.34(14) . . ? 
O2 P1 C1 105.71(14) . . ? 
O1 P1 Au1 119.42(9) . . ? 
O2 P1 Au1 108.35(9) . . ? 
C1 P1 Au1 119.47(12) . . ? 
O3 P2 O4 103.45(13) . . ? 
O3 P2 C1 98.35(14) . . ? 
O4 P2 C1 105.18(14) . . ? 
O3 P2 Au2 120.75(10) . . ? 
O4 P2 Au2 110.60(9) . . ? 
C1 P2 Au2 116.57(11) . . ? 
O5 P3 O6 105.05(13) . . ? 
O5 P3 C2 95.62(14) . . ? 
O6 P3 C2 105.79(14) . . ? 
O5 P3 Au1 122.65(10) . . ? 
O6 P3 Au1 110.19(9) . . ? 
C2 P3 Au1 115.57(12) . . ? 
O7 P4 O8 104.77(13) . . ? 
O7 P4 C2 96.13(15) . . ? 
O8 P4 C2 98.03(15) . . ? 
O7 P4 Au2 119.20(10) . . ? 
O8 P4 Au2 115.85(10) . . ? 
C2 P4 Au2 119.15(12) . . ? 
O10 P5 O9 100.37(13) . . ? 
O10 P5 C3 101.45(15) . . ? 
O9 P5 C3 96.52(14) . . ? 
O10 P5 Au1 118.82(9) . . ? 
O9 P5 Au1 117.66(10) . . ? 
C3 P5 Au1 118.14(11) . . ? 
O12 P6 O11 105.84(14) . . ? 
O12 P6 C3 94.97(15) . . ? 
O11 P6 C3 105.97(15) . . ? 
O12 P6 Au2 121.45(10) . . ? 
O11 P6 Au2 107.99(9) . . ? 
C3 P6 Au2 118.92(12) . . ? 
C4 O1 P1 119.1(2) . . ? 
C6 O2 P1 123.5(2) . . ? 
C8 O3 P2 121.3(2) . . ? 
C10 O4 P2 122.4(2) . . ? 
C12 O5 P3 121.6(2) . . ? 
C14 O6 P3 123.0(2) . . ? 
C16 O7 P4 125.3(2) . . ? 
C18 O8 P4 119.6(2) . . ? 
C20 O9 P5 121.7(2) . . ? 
C22 O10 P5 124.2(2) . . ? 
C24 O11 P6 123.6(2) . . ? 
C26 O12 P6 123.3(2) . . ? 
P2 C1 P1 113.79(18) . . ? 
P4 C2 P3 116.46(19) . . ? 
P6 C3 P5 115.16(19) . . ? 
O1 C4 C5 106.6(3) . . ? 
F1 C5 F2 107.8(3) . . ? 
F1 C5 F3 107.0(3) . . ? 
F2 C5 F3 106.9(3) . . ? 
F1 C5 C4 113.6(3) . . ? 
F2 C5 C4 109.0(3) . . ? 
F3 C5 C4 112.1(3) . . ? 
O2 C6 C7 106.5(3) . . ? 
F4 C7 F5 108.2(3) . . ? 
F4 C7 F6 106.3(3) . . ? 
F5 C7 F6 107.4(3) . . ? 
F4 C7 C6 113.0(3) . . ? 
F5 C7 C6 110.3(3) . . ? 
F6 C7 C6 111.4(3) . . ? 
O3 C8 C9 108.2(3) . . ? 
F8 C9 F7 107.2(3) . . ? 
F8 C9 F9 107.1(3) . . ? 
F7 C9 F9 106.5(3) . . ? 
F8 C9 C8 110.7(3) . . ? 
F7 C9 C8 112.9(3) . . ? 
F9 C9 C8 112.1(3) . . ? 
O4 C10 C11 106.9(3) . . ? 
F11 C11 F10 106.3(3) . . ? 
F11 C11 F12 107.5(3) . . ? 
F10 C11 F12 106.9(3) . . ? 
F11 C11 C10 113.1(3) . . ? 
F10 C11 C10 112.2(3) . . ? 
F12 C11 C10 110.5(3) . . ? 
O5 C12 C13 107.7(3) . . ? 
F15 C13 F14 107.3(3) . . ? 
F15 C13 F13 106.5(3) . . ? 
F14 C13 F13 106.9(3) . . ? 
F15 C13 C12 113.1(3) . . ? 
F14 C13 C12 110.4(3) . . ? 
F13 C13 C12 112.3(3) . . ? 
O6 C14 C15 107.7(3) . . ? 
F16 C15 F18 108.2(4) . . ? 
F16 C15 F17 106.6(4) . . ? 
F18 C15 F17 107.5(3) . . ? 
F16 C15 C14 112.6(3) . . ? 
F18 C15 C14 109.6(4) . . ? 
F17 C15 C14 112.1(4) . . ? 
O7 C16 C17 107.7(3) . . ? 
F20 C17 F21 107.1(3) . . ? 
F20 C17 F19 107.0(3) . . ? 
F21 C17 F19 107.3(3) . . ? 
F20 C17 C16 113.1(3) . . ? 
F21 C17 C16 112.0(3) . . ? 
F19 C17 C16 110.1(3) . . ? 
O8 C18 C19 107.4(3) . . ? 
F23 C19 F24 107.2(3) . . ? 
F23 C19 F22 107.5(3) . . ? 
F24 C19 F22 106.9(3) . . ? 
F23 C19 C18 112.9(3) . . ? 
F24 C19 C18 112.7(3) . . ? 
F22 C19 C18 109.2(3) . . ? 
O9 C20 C21 106.9(3) . . ? 
F27 C21 F26 107.5(3) . . ? 
F27 C21 F25 106.8(3) . . ? 
F26 C21 F25 107.5(3) . . ? 
F27 C21 C20 113.3(3) . . ? 
F26 C21 C20 109.8(3) . . ? 
F25 C21 C20 111.8(3) . . ? 
O10 C22 C23 108.9(3) . . ? 
F29 C23 F30 107.5(3) . . ? 
F29 C23 F28 107.6(3) . . ? 
F30 C23 F28 106.6(3) . . ? 
F29 C23 C22 110.3(3) . . ? 
F30 C23 C22 113.2(3) . . ? 
F28 C23 C22 111.4(3) . . ? 
O11 C24 C25 106.8(3) . . ? 
F32 C25 F33 105.6(3) . . ? 
F32 C25 F31 107.9(3) . . ? 
F33 C25 F31 107.2(3) . . ? 
F32 C25 C24 112.2(3) . . ? 
F33 C25 C24 113.0(3) . . ? 
F31 C25 C24 110.5(3) . . ? 
O12 C26 C27 105.6(3) . . ? 
F34 C27 F36 108.5(3) . . ? 
F34 C27 F35 106.1(3) . . ? 
F36 C27 F35 107.8(3) . . ? 
F34 C27 C26 113.0(3) . . ? 
F36 C27 C26 109.9(3) . . ? 
F35 C27 C26 111.2(3) . . ? 
C4S O1S C1S 105.1(4) . . ? 
C8S O2S C5S 108.5(3) . . ? 
C9S O3S C12S 105.0(4) . . ? 
O1S C1S C2S 105.2(4) . . ? 
C3S C2S C1S 104.3(5) . . ? 
C2S C3S C4S 105.4(5) . . ? 
O1S C4S C3S 104.9(5) . . ? 
O2S C5S C6S 106.6(3) . . ? 
C5S C6S C7S 102.8(3) . . ? 
C8S C7S C6S 101.6(3) . . ? 
O2S C8S C7S 106.0(3) . . ? 
O3S C9S C10S 107.8(4) . . ? 
C9S C10S C11S 103.7(4) . . ? 
C12S C11S C10S 104.4(4) . . ? 
O3S C12S C11S 105.7(4) . . ? 
  
_diffrn_measured_fraction_theta_max    0.994 
_diffrn_reflns_theta_full              23.05 
_diffrn_measured_fraction_theta_full   0.994 
_refine_diff_density_max    0.599 
_refine_diff_density_min   -1.073 
_refine_diff_density_rms    0.100 

#===END

_publ_contact_author		'Daniel G. Nocera'
_publ_contact_author_email	nocera@mit.edu


loop_
_publ_author_name			'J.L.Dempsey, A.J.Esswein, D.R.Manke,' 
					'J.Rosenthal, J.D.Soper, D.G.Nocera'
_journal_name_full		'Inorganic Chemistry'
_chemical_name_systematic 	'Au(dppm)Rh(CNtBu)2Cl2'
_chemical_name_common             ? 
_chemical_melting_point           ? 
_chemical_formula_moiety          ? 
_chemical_formula_sum 
 'C63 H68 Au Cl8 N2 P4 Rh' 
_chemical_formula_weight          1560.55 

loop_ 
 _atom_type_symbol 
 _atom_type_description 
 _atom_type_scat_dispersion_real 
 _atom_type_scat_dispersion_imag 
 _atom_type_scat_source 
 'C'  'C'   0.0033   0.0016 
 'International Tables Vol C Tables 4.2.6.8 and 6.1.1.4' 
 'H'  'H'   0.0000   0.0000 
 'International Tables Vol C Tables 4.2.6.8 and 6.1.1.4' 
 'N'  'N'   0.0061   0.0033 
 'International Tables Vol C Tables 4.2.6.8 and 6.1.1.4' 
 'P'  'P'   0.1023   0.0942 
 'International Tables Vol C Tables 4.2.6.8 and 6.1.1.4' 
 'Cl'  'Cl'   0.1484   0.1585 
 'International Tables Vol C Tables 4.2.6.8 and 6.1.1.4' 
 'Rh'  'Rh'  -1.1178   0.9187 
 'International Tables Vol C Tables 4.2.6.8 and 6.1.1.4' 
 'Au'  'Au'  -2.0133   8.8022 
 'International Tables Vol C Tables 4.2.6.8 and 6.1.1.4' 
  
_symmetry_cell_setting            Monoclinic 
_symmetry_space_group_name_H-M    P2(1)/c 
  
loop_ 
 _symmetry_equiv_pos_as_xyz 
 'x, y, z' 
 '-x, y+1/2, -z+1/2' 
 '-x, -y, -z' 
 'x, -y-1/2, z-1/2' 
  
_cell_length_a                    26.651(4) 
_cell_length_b                    13.2594(18) 
_cell_length_c                    18.991(3) 
_cell_angle_alpha                 90.00 
_cell_angle_beta                  102.282(3) 
_cell_angle_gamma                 90.00 
_cell_volume                      6557.5(16) 
_cell_formula_units_Z             4 
_cell_measurement_temperature     150(2) 
_cell_measurement_reflns_used     ? 
_cell_measurement_theta_min       ? 
_cell_measurement_theta_max       ? 
  
_exptl_crystal_description        block 
_exptl_crystal_colour             orange 
_exptl_crystal_size_max           0.32 
_exptl_crystal_size_mid           0.18 
_exptl_crystal_size_min           0.12 
_exptl_crystal_density_meas       0 
_exptl_crystal_density_diffrn     1.581 
_exptl_crystal_density_method     'not measured' 
_exptl_crystal_F_000              3120 
_exptl_absorpt_coefficient_mu     2.950 
_exptl_absorpt_correction_type    'empirical' 
_exptl_absorpt_correction_T_min   ? 
_exptl_absorpt_correction_T_max   ? 
_exptl_absorpt_process_details    'SADABS'
  
_exptl_special_details 
; 
 ? 
; 
  
_diffrn_ambient_temperature       150(2) 
_diffrn_radiation_wavelength      0.71073 
_diffrn_radiation_type            MoK\a 
_diffrn_radiation_source          'fine-focus sealed tube' 
_diffrn_radiation_monochromator   graphite 
_diffrn_measurement_device_type   'CCD area detector' 
_diffrn_measurement_method        'phi and omega scans' 
_diffrn_detector_area_resol_mean  ? 
_diffrn_standards_number          ? 
_diffrn_standards_interval_count  ? 
_diffrn_standards_interval_time   ? 
_diffrn_standards_decay_%         ? 
_diffrn_reflns_number             30738 
_diffrn_reflns_av_R_equivalents   0.0634 
_diffrn_reflns_av_sigmaI/netI     0.0646 
_diffrn_reflns_limit_h_min        -29 
_diffrn_reflns_limit_h_max        26 
_diffrn_reflns_limit_k_min        -14 
_diffrn_reflns_limit_k_max        14 
_diffrn_reflns_limit_l_min        -21 
_diffrn_reflns_limit_l_max        20 
_diffrn_reflns_theta_min          0.78 
_diffrn_reflns_theta_max          23.29 
_reflns_number_total              9425 
_reflns_number_gt                 7705 
_reflns_threshold_expression      >2sigma(I) 
  
_computing_data_collection        'Bruker SMART' 
_computing_cell_refinement        'Bruker SMART' 
_computing_data_reduction         'Bruker SAINT' 
_computing_structure_solution     'SHELXS-97 (Sheldrick, 1990)' 
_computing_structure_refinement   'SHELXL-97 (Sheldrick, 1997)' 
_computing_molecular_graphics     'Bruker SHELXTL' 
_computing_publication_material   'Bruker SHELXTL' 
  
_refine_special_details 
; 
 Refinement of F^2^ against ALL reflections.  The weighted R-factor wR and 
 goodness of fit S are based on F^2^, conventional R-factors R are based 
 on F, with F set to zero for negative F^2^. The threshold expression of 
 F^2^ > 2sigma(F^2^) is used only for calculating R-factors(gt) etc. and is 
 not relevant to the choice of reflections for refinement.  R-factors based 
 on F^2^ are statistically about twice as large as those based on F, and R- 
 factors based on ALL data will be even larger. 
; 
  
_refine_ls_structure_factor_coef  Fsqd 
_refine_ls_matrix_type            full 
_refine_ls_weighting_scheme       calc 
_refine_ls_weighting_details 
 'calc w=1/[\s^2^(Fo^2^)+(0.0563P)^2^+102.6659P] where P=(Fo^2^+2Fc^2^)/3' 
_atom_sites_solution_primary      direct 
_atom_sites_solution_secondary    difmap 
_atom_sites_solution_hydrogens    geom 
_refine_ls_hydrogen_treatment     mixed 
_refine_ls_extinction_method      none 
_refine_ls_extinction_coef        ? 
_refine_ls_number_reflns          9425 
_refine_ls_number_parameters      741 
_refine_ls_number_restraints      685 
_refine_ls_R_factor_all           0.0844 
_refine_ls_R_factor_gt            0.0683 
_refine_ls_wR_factor_ref          0.1661 
_refine_ls_wR_factor_gt           0.1595 
_refine_ls_goodness_of_fit_ref    1.131 
_refine_ls_restrained_S_all       1.100 
_refine_ls_shift/su_max           0.068 
_refine_ls_shift/su_mean          0.002 
  
loop_ 
 _atom_site_label 
 _atom_site_type_symbol 
 _atom_site_fract_x 
 _atom_site_fract_y 
 _atom_site_fract_z 
 _atom_site_U_iso_or_equiv 
 _atom_site_adp_type 
 _atom_site_occupancy 
 _atom_site_symmetry_multiplicity 
 _atom_site_calc_flag 
 _atom_site_refinement_flags 
 _atom_site_disorder_assembly 
 _atom_site_disorder_group 
Au1 Au 0.290924(18) 1.06516(3) 1.03510(2) 0.02315(15) Uani 1 1 d U . . 
Rh1 Rh 0.29098(3) 0.90740(5) 0.92774(4) 0.0133(2) Uani 1 1 d U . . 
P1 P 0.24635(12) 0.9673(2) 1.10206(14) 0.0219(6) Uani 1 1 d U . . 
P2 P 0.24778(11) 0.79618(19) 0.98769(14) 0.0192(6) Uani 1 1 d U . . 
P3 P 0.33008(11) 1.17971(19) 0.97203(14) 0.0178(6) Uani 1 1 d U . . 
P4 P 0.33327(11) 1.00897(19) 0.85932(13) 0.0166(6) Uani 1 1 d U . . 
N1 N 0.1870(4) 1.0132(7) 0.8677(5) 0.035(2) Uani 1 1 d U . . 
N2 N 0.3958(4) 0.8309(7) 1.0157(5) 0.030(2) Uani 1 1 d U . . 
C1 C 0.2157(4) 0.8610(7) 1.0525(5) 0.0153(14) Uani 1 1 d U . . 
H1A H 0.1816 0.8835 1.0257 0.018 Uiso 1 1 calc R . . 
H1B H 0.2097 0.8101 1.0880 0.018 Uiso 1 1 calc R . . 
C2 C 0.3640(4) 1.1194(7) 0.9098(5) 0.0153(14) Uani 1 1 d U . . 
H2A H 0.3982 1.0982 0.9375 0.018 Uiso 1 1 calc R . . 
H2B H 0.3698 1.1706 0.8745 0.018 Uiso 1 1 calc R . . 
C3 C 0.1919(5) 1.0318(8) 1.1237(6) 0.027(2) Uani 1 1 d U . . 
C4 C 0.1526(5) 0.9807(10) 1.1443(8) 0.049(3) Uani 1 1 d U . . 
H4 H 0.1539 0.9092 1.1473 0.059 Uiso 1 1 calc R . . 
C5 C 0.1105(6) 1.0312(12) 1.1611(10) 0.066(4) Uani 1 1 d U . . 
H5 H 0.0832 0.9947 1.1742 0.079 Uiso 1 1 calc R . . 
C6 C 0.1097(7) 1.1347(12) 1.1582(9) 0.066(4) Uani 1 1 d U . . 
H6 H 0.0813 1.1704 1.1688 0.079 Uiso 1 1 calc R . . 
C7 C 0.1496(7) 1.1870(11) 1.1401(9) 0.065(4) Uani 1 1 d U . . 
H7 H 0.1497 1.2587 1.1407 0.078 Uiso 1 1 calc R . . 
C8 C 0.1890(6) 1.1358(9) 1.1212(8) 0.051(4) Uani 1 1 d U . . 
H8 H 0.2153 1.1727 1.1058 0.061 Uiso 1 1 calc R . . 
C9 C 0.2853(4) 0.9309(7) 1.1886(6) 0.021(2) Uani 1 1 d U . . 
C10 C 0.2681(4) 0.8593(8) 1.2327(6) 0.025(2) Uani 1 1 d U . . 
H10 H 0.2370 0.8236 1.2155 0.031 Uiso 1 1 calc R . . 
C11 C 0.2969(4) 0.8410(8) 1.3017(6) 0.026(2) Uani 1 1 d U . . 
H11 H 0.2855 0.7926 1.3317 0.031 Uiso 1 1 calc R . . 
C12 C 0.3415(5) 0.8928(8) 1.3263(6) 0.030(2) Uani 1 1 d U . . 
H12 H 0.3606 0.8797 1.3736 0.036 Uiso 1 1 calc R . . 
C13 C 0.3594(5) 0.9633(8) 1.2847(6) 0.033(3) Uani 1 1 d U . . 
H13 H 0.3906 0.9983 1.3027 0.039 Uiso 1 1 calc R . . 
C14 C 0.3307(4) 0.9825(8) 1.2150(6) 0.025(2) Uani 1 1 d U . . 
H14 H 0.3424 1.0313 1.1857 0.030 Uiso 1 1 calc R . . 
C15 C 0.2853(4) 0.6921(7) 1.0338(6) 0.021(2) Uani 1 1 d U . . 
C16 C 0.3107(4) 0.6966(8) 1.1046(6) 0.027(2) Uani 1 1 d U . . 
H16 H 0.3080 0.7559 1.1317 0.032 Uiso 1 1 calc R . . 
C17 C 0.3399(4) 0.6178(9) 1.1373(6) 0.030(3) Uani 1 1 d U . . 
H17 H 0.3572 0.6224 1.1864 0.036 Uiso 1 1 calc R . . 
C18 C 0.3439(5) 0.5310(9) 1.0980(7) 0.034(3) Uani 1 1 d U . . 
H18 H 0.3637 0.4756 1.1202 0.041 Uiso 1 1 calc R . . 
C19 C 0.3194(5) 0.5257(8) 1.0277(7) 0.036(3) Uani 1 1 d U . . 
H19 H 0.3226 0.4665 1.0008 0.043 Uiso 1 1 calc R . . 
C20 C 0.2897(5) 0.6050(8) 0.9944(6) 0.030(3) Uani 1 1 d U . . 
H20 H 0.2726 0.6002 0.9453 0.036 Uiso 1 1 calc R . . 
C21 C 0.1951(4) 0.7306(7) 0.9328(5) 0.020(2) Uani 1 1 d U . . 
C22 C 0.1644(5) 0.6635(9) 0.9654(7) 0.037(3) Uani 1 1 d U . . 
H22 H 0.1717 0.6566 1.0164 0.044 Uiso 1 1 calc R . . 
C23 C 0.1256(6) 0.6100(11) 0.9255(8) 0.053(4) Uani 1 1 d U . . 
H23 H 0.1066 0.5647 0.9486 0.064 Uiso 1 1 calc R . . 
C24 C 0.1132(5) 0.6202(10) 0.8515(8) 0.049(3) Uani 1 1 d U . . 
H24 H 0.0857 0.5822 0.8237 0.058 Uiso 1 1 calc R . . 
C25 C 0.1405(5) 0.6853(10) 0.8184(7) 0.038(3) Uani 1 1 d U . . 
H25 H 0.1316 0.6927 0.7675 0.046 Uiso 1 1 calc R . . 
C26 C 0.1810(4) 0.7407(8) 0.8578(6) 0.026(2) Uani 1 1 d U . . 
H26 H 0.1993 0.7860 0.8337 0.031 Uiso 1 1 calc R . . 
C27 C 0.3800(4) 1.2571(7) 1.0252(5) 0.019(2) Uani 1 1 d U . . 
C28 C 0.3942(4) 1.2495(8) 1.1003(5) 0.022(2) Uani 1 1 d U . . 
H28 H 0.3771 1.2023 1.1247 0.026 Uiso 1 1 calc R . . 
C29 C 0.4327(5) 1.3098(8) 1.1397(6) 0.029(2) Uani 1 1 d U . . 
H29 H 0.4422 1.3036 1.1907 0.035 Uiso 1 1 calc R . . 
C30 C 0.4569(5) 1.3782(9) 1.1044(6) 0.033(3) Uani 1 1 d U . . 
H30 H 0.4833 1.4195 1.1312 0.039 Uiso 1 1 calc R . . 
C31 C 0.4436(5) 1.3884(8) 1.0311(6) 0.029(2) Uani 1 1 d U . . 
H31 H 0.4608 1.4367 1.0078 0.035 Uiso 1 1 calc R . . 
C32 C 0.4052(5) 1.3284(8) 0.9902(6) 0.027(2) Uani 1 1 d U . . 
H32 H 0.3961 1.3357 0.9393 0.032 Uiso 1 1 calc R . . 
C33 C 0.2831(4) 1.2683(7) 0.9223(5) 0.018(2) Uani 1 1 d U . . 
C34 C 0.2393(5) 1.2885(8) 0.9507(6) 0.030(3) Uani 1 1 d U . . 
H34 H 0.2340 1.2518 0.9914 0.036 Uiso 1 1 calc R . . 
C35 C 0.2047(5) 1.3598(10) 0.9204(7) 0.038(3) Uani 1 1 d U . . 
H35 H 0.1756 1.3740 0.9402 0.045 Uiso 1 1 calc R . . 
C36 C 0.2127(5) 1.4124(9) 0.8593(7) 0.040(3) Uani 1 1 d U . . 
H36 H 0.1889 1.4627 0.8376 0.048 Uiso 1 1 calc R . . 
C37 C 0.2549(5) 1.3909(9) 0.8309(6) 0.034(3) Uani 1 1 d U . . 
H37 H 0.2597 1.4262 0.7893 0.041 Uiso 1 1 calc R . . 
C38 C 0.2900(5) 1.3196(8) 0.8614(6) 0.029(3) Uani 1 1 d U . . 
H38 H 0.3189 1.3055 0.8411 0.035 Uiso 1 1 calc R . . 
C39 C 0.2951(4) 1.0506(7) 0.7733(5) 0.018(2) Uani 1 1 d U . . 
C40 C 0.3076(4) 1.1366(8) 0.7381(6) 0.025(2) Uani 1 1 d U . . 
H40 H 0.3350 1.1787 0.7611 0.030 Uiso 1 1 calc R . . 
C41 C 0.2804(5) 1.1608(9) 0.6703(6) 0.033(3) Uani 1 1 d U . . 
H41 H 0.2886 1.2200 0.6469 0.040 Uiso 1 1 calc R . . 
C42 C 0.2406(5) 1.0981(10) 0.6362(6) 0.037(3) Uani 1 1 d U . . 
H42 H 0.2213 1.1154 0.5897 0.045 Uiso 1 1 calc R . . 
C43 C 0.2292(5) 1.0114(9) 0.6693(6) 0.032(3) Uani 1 1 d U . . 
H43 H 0.2027 0.9681 0.6454 0.038 Uiso 1 1 calc R . . 
C44 C 0.2566(4) 0.9876(8) 0.7376(5) 0.023(2) Uani 1 1 d U . . 
H44 H 0.2489 0.9274 0.7603 0.028 Uiso 1 1 calc R . . 
C45 C 0.3889(4) 0.9539(7) 0.8324(5) 0.0156(19) Uani 1 1 d U . . 
C46 C 0.4234(4) 1.0142(8) 0.8050(6) 0.025(2) Uani 1 1 d U . . 
H46 H 0.4190 1.0854 0.8031 0.030 Uiso 1 1 calc R . . 
C47 C 0.4632(4) 0.9717(9) 0.7809(6) 0.026(2) Uani 1 1 d U . . 
H47 H 0.4865 1.0135 0.7628 0.032 Uiso 1 1 calc R . . 
C48 C 0.4699(5) 0.8685(9) 0.7828(6) 0.032(3) Uani 1 1 d U . . 
H48 H 0.4976 0.8398 0.7654 0.038 Uiso 1 1 calc R . . 
C49 C 0.4368(5) 0.8067(8) 0.8096(6) 0.031(3) Uani 1 1 d U . . 
H49 H 0.4417 0.7357 0.8114 0.038 Uiso 1 1 calc R . . 
C50 C 0.3962(4) 0.8502(8) 0.8338(6) 0.024(2) Uani 1 1 d U . . 
H50 H 0.3729 0.8082 0.8517 0.029 Uiso 1 1 calc R . . 
C51 C 0.2247(5) 0.9723(8) 0.8858(6) 0.026(2) Uani 1 1 d U . . 
C52 C 0.1380(5) 1.0634(10) 0.8427(8) 0.049(3) Uani 1 1 d U . . 
C53 C 0.1483(7) 1.1449(13) 0.7881(9) 0.074(5) Uani 1 1 d U . . 
H53A H 0.1172 1.1852 0.7716 0.110 Uiso 1 1 calc R . . 
H53B H 0.1578 1.1116 0.7467 0.110 Uiso 1 1 calc R . . 
H53C H 0.1764 1.1889 0.8117 0.110 Uiso 1 1 calc R . . 
C54 C 0.1027(6) 0.9829(14) 0.8043(11) 0.085(6) Uani 1 1 d U . . 
H54A H 0.0954 0.9340 0.8395 0.127 Uiso 1 1 calc R . . 
H54B H 0.1191 0.9485 0.7695 0.127 Uiso 1 1 calc R . . 
H54C H 0.0705 1.0139 0.7790 0.127 Uiso 1 1 calc R . . 
C55 C 0.1215(6) 1.1117(10) 0.9040(8) 0.059(4) Uani 1 1 d U . . 
H55A H 0.1152 1.0598 0.9378 0.089 Uiso 1 1 calc R . . 
H55B H 0.0898 1.1500 0.8863 0.089 Uiso 1 1 calc R . . 
H55C H 0.1485 1.1575 0.9286 0.089 Uiso 1 1 calc R . . 
C56 C 0.3564(4) 0.8570(8) 0.9807(6) 0.021(2) Uani 1 1 d U . . 
C57 C 0.4451(4) 0.7987(9) 1.0585(6) 0.030(2) Uani 1 1 d U . . 
C58 C 0.4877(5) 0.8570(11) 1.0312(8) 0.048(3) Uani 1 1 d U . . 
H58A H 0.5215 0.8327 1.0566 0.072 Uiso 1 1 calc R . . 
H58B H 0.4848 0.9292 1.0405 0.072 Uiso 1 1 calc R . . 
H58C H 0.4839 0.8458 0.9793 0.072 Uiso 1 1 calc R . . 
C59 C 0.4493(5) 0.6858(9) 1.0485(8) 0.043(3) Uani 1 1 d U . . 
H59A H 0.4201 0.6520 1.0624 0.065 Uiso 1 1 calc R . . 
H59B H 0.4814 0.6612 1.0789 0.065 Uiso 1 1 calc R . . 
H59C H 0.4491 0.6711 0.9979 0.065 Uiso 1 1 calc R . . 
C60 C 0.4452(5) 0.8263(10) 1.1373(7) 0.042(3) Uani 1 1 d U . . 
H60A H 0.4165 0.7923 1.1523 0.063 Uiso 1 1 calc R . . 
H60B H 0.4414 0.8995 1.1414 0.063 Uiso 1 1 calc R . . 
H60C H 0.4776 0.8047 1.1683 0.063 Uiso 1 1 calc R . . 
Cl1 Cl 0.57931(11) 0.7977(2) 0.69227(14) 0.0277(6) Uani 1 1 d . . . 
Cl2 Cl 0.14316(16) 0.8000(2) 0.6499(2) 0.0531(10) Uani 1 1 d . . . 
C1A C 0.0183(14) 0.789(3) 0.702(3) 0.190(13) Uani 0.711(18) 1 d PDU A 1 
H1AA H 0.0425 0.8067 0.7471 0.228 Uiso 0.711(18) 1 calc PR A 1 
H1AB H 0.0357 0.8067 0.6620 0.228 Uiso 0.711(18) 1 calc PR A 1 
Cl1A Cl 0.0110(3) 0.6639(7) 0.7005(7) 0.127(5) Uani 0.711(18) 1 d PDU A 1 
Cl2A Cl -0.0323(4) 0.8669(8) 0.6942(8) 0.229(5) Uani 0.711(18) 1 d PDU A 1 
C1B C 0.0216(18) 0.803(7) 0.729(8) 0.212(17) Uani 0.289(18) 1 d PDU A 2 
H1BA H 0.0371 0.7743 0.6908 0.255 Uiso 0.289(18) 1 calc PR A 2 
H1BB H 0.0470 0.8472 0.7603 0.255 Uiso 0.289(18) 1 calc PR A 2 
Cl1B Cl 0.0017(12) 0.712(3) 0.778(3) 0.214(15) Uani 0.289(18) 1 d PDU A 2 
Cl2B Cl -0.0323(4) 0.8669(8) 0.6942(8) 0.229(5) Uani 0.289(18) 1 d PDU A 2 
Cl1C Cl 0.0604(6) 0.8639(11) -0.0531(7) 0.253(6) Uani 0.54(2) 1 d PDU B 1 
C1C C 0.0458(13) 0.814(2) 0.013(2) 0.197(8) Uani 0.54(2) 1 d PDU B 1 
H1CA H 0.0417 0.8690 0.0472 0.236 Uiso 0.54(2) 1 calc PR B 1 
H1CB H 0.0753 0.7728 0.0374 0.236 Uiso 0.54(2) 1 calc PR B 1 
Cl2C Cl -0.0046(7) 0.7448(19) 0.0024(13) 0.220(13) Uani 0.54(2) 1 d PDU B 1 
Cl1D Cl 0.0604(6) 0.8639(11) -0.0531(7) 0.253(6) Uani 0.46(2) 1 d PDU B 2 
C1D C 0.0458(13) 0.814(2) 0.013(2) 0.197(8) Uani 0.46(2) 1 d PDU B 2 
H1DA H 0.0762 0.8140 0.0536 0.236 Uiso 0.46(2) 1 calc PR B 2 
H1DB H 0.0356 0.7435 0.0017 0.236 Uiso 0.46(2) 1 calc PR B 2 
Cl2D Cl -0.0005(9) 0.872(3) 0.0382(15) 0.241(14) Uani 0.46(2) 1 d PDU B 2 
C1E C 0.0642(13) 0.492(3) 0.0816(16) 0.197(13) Uani 1 1 d U . . 
H1E1 H 0.0902 0.5293 0.1171 0.236 Uiso 1 1 calc R . . 
H1E2 H 0.0450 0.5416 0.0470 0.236 Uiso 1 1 calc R . . 
Cl1E Cl 0.0242(4) 0.4343(12) 0.1235(6) 0.267(8) Uani 1 1 d U . . 
Cl2E Cl 0.0950(4) 0.4055(7) 0.0354(6) 0.196(5) Uani 1 1 d U . . 
  
loop_ 
 _atom_site_aniso_label 
 _atom_site_aniso_U_11 
 _atom_site_aniso_U_22 
 _atom_site_aniso_U_33 
 _atom_site_aniso_U_23 
 _atom_site_aniso_U_13 
 _atom_site_aniso_U_12 
Au1 0.0389(3) 0.0119(2) 0.0207(2) 0.00104(17) 0.01083(18) -0.0012(2) 
Rh1 0.0218(5) 0.0063(4) 0.0122(4) 0.0022(3) 0.0046(3) 0.0002(3) 
P1 0.0357(17) 0.0129(14) 0.0186(14) 0.0007(11) 0.0095(13) 0.0004(12) 
P2 0.0294(16) 0.0123(13) 0.0161(14) 0.0013(11) 0.0052(12) -0.0004(12) 
P3 0.0271(16) 0.0105(13) 0.0170(14) -0.0004(10) 0.0075(12) 0.0004(11) 
P4 0.0248(15) 0.0098(13) 0.0150(13) 0.0001(10) 0.0039(11) 0.0015(11) 
N1 0.031(5) 0.028(5) 0.043(6) -0.001(4) 0.005(4) 0.004(4) 
N2 0.029(5) 0.030(5) 0.032(5) 0.007(4) 0.005(4) -0.005(4) 
C1 0.021(4) 0.012(3) 0.015(3) -0.001(3) 0.010(3) -0.001(3) 
C2 0.021(4) 0.012(3) 0.015(3) -0.001(3) 0.010(3) -0.001(3) 
C3 0.044(6) 0.018(5) 0.020(5) -0.003(4) 0.012(5) 0.004(4) 
C4 0.053(8) 0.028(6) 0.076(9) -0.004(7) 0.035(7) -0.001(5) 
C5 0.054(9) 0.047(7) 0.110(12) 0.004(9) 0.048(9) 0.006(7) 
C6 0.067(10) 0.047(7) 0.092(11) -0.017(8) 0.036(9) 0.015(7) 
C7 0.080(10) 0.023(6) 0.099(12) 0.007(8) 0.036(9) 0.020(6) 
C8 0.084(10) 0.017(5) 0.064(9) 0.006(6) 0.041(8) 0.004(6) 
C9 0.031(5) 0.011(5) 0.025(5) -0.003(4) 0.013(4) 0.000(4) 
C10 0.031(6) 0.026(6) 0.021(5) -0.003(4) 0.010(4) -0.004(5) 
C11 0.041(7) 0.021(6) 0.020(5) -0.003(4) 0.013(5) -0.004(5) 
C12 0.038(6) 0.024(6) 0.027(6) 0.002(4) 0.004(5) 0.002(5) 
C13 0.041(7) 0.017(6) 0.038(6) 0.003(5) 0.005(5) -0.002(5) 
C14 0.031(6) 0.013(5) 0.033(5) 0.001(4) 0.013(4) -0.001(4) 
C15 0.028(6) 0.011(4) 0.025(5) 0.009(4) 0.007(4) 0.001(4) 
C16 0.040(7) 0.018(5) 0.023(5) 0.002(4) 0.008(5) 0.001(5) 
C17 0.029(7) 0.035(6) 0.026(6) 0.013(4) 0.003(5) 0.003(5) 
C18 0.029(7) 0.023(5) 0.052(6) 0.016(5) 0.010(5) 0.006(5) 
C19 0.045(8) 0.012(5) 0.053(6) 0.001(5) 0.015(6) 0.003(5) 
C20 0.045(7) 0.018(5) 0.028(6) -0.003(4) 0.008(5) 0.000(5) 
C21 0.040(6) 0.008(5) 0.012(4) -0.004(4) 0.004(4) -0.005(4) 
C22 0.049(7) 0.028(7) 0.034(6) -0.002(5) 0.011(5) -0.013(5) 
C23 0.054(9) 0.045(8) 0.061(7) -0.004(7) 0.013(7) -0.025(6) 
C24 0.044(8) 0.039(8) 0.057(7) -0.013(6) -0.001(6) -0.015(6) 
C25 0.042(7) 0.043(7) 0.028(6) -0.012(5) 0.004(5) 0.000(5) 
C26 0.034(6) 0.019(6) 0.024(5) -0.005(4) 0.006(4) 0.004(4) 
C27 0.028(5) 0.008(5) 0.019(4) -0.008(4) 0.000(4) 0.000(4) 
C28 0.030(6) 0.016(5) 0.019(4) 0.002(4) 0.003(4) 0.006(4) 
C29 0.038(7) 0.024(6) 0.018(5) -0.004(4) -0.008(4) 0.008(5) 
C30 0.037(7) 0.029(6) 0.030(5) -0.012(5) 0.001(5) 0.001(5) 
C31 0.040(7) 0.017(6) 0.031(5) -0.001(5) 0.012(5) -0.004(5) 
C32 0.047(7) 0.017(5) 0.018(5) -0.006(4) 0.009(5) -0.007(4) 
C33 0.021(5) 0.013(5) 0.018(5) -0.002(4) 0.002(4) -0.005(4) 
C34 0.040(6) 0.023(6) 0.031(6) 0.010(5) 0.015(5) 0.006(5) 
C35 0.037(7) 0.038(7) 0.038(7) -0.002(5) 0.009(5) 0.015(5) 
C36 0.042(7) 0.026(7) 0.049(7) 0.009(5) 0.001(6) 0.012(5) 
C37 0.044(7) 0.025(6) 0.034(6) 0.012(5) 0.006(5) 0.002(5) 
C38 0.041(7) 0.022(6) 0.031(6) 0.005(4) 0.022(5) 0.004(5) 
C39 0.028(5) 0.014(5) 0.011(4) 0.002(3) 0.002(4) 0.005(4) 
C40 0.033(6) 0.021(5) 0.021(5) 0.008(4) 0.005(4) 0.000(5) 
C41 0.045(7) 0.028(6) 0.025(6) 0.018(5) 0.006(5) 0.002(5) 
C42 0.036(7) 0.045(7) 0.027(6) 0.014(5) -0.001(5) 0.004(5) 
C43 0.039(7) 0.030(6) 0.022(5) 0.000(5) -0.005(5) 0.002(5) 
C44 0.033(6) 0.018(5) 0.018(5) -0.002(4) 0.005(4) -0.001(4) 
C45 0.021(5) 0.013(4) 0.013(5) 0.001(4) 0.004(4) -0.001(4) 
C46 0.029(6) 0.018(5) 0.031(6) 0.002(5) 0.009(5) 0.000(4) 
C47 0.024(6) 0.033(5) 0.024(6) 0.006(5) 0.010(5) 0.006(5) 
C48 0.041(7) 0.033(6) 0.022(6) -0.003(5) 0.009(5) 0.006(5) 
C49 0.042(7) 0.017(5) 0.035(7) 0.003(5) 0.009(5) 0.010(5) 
C50 0.033(6) 0.015(4) 0.023(6) -0.004(4) 0.005(5) -0.001(4) 
C51 0.032(5) 0.022(6) 0.026(5) 0.004(4) 0.009(4) 0.002(4) 
C52 0.048(7) 0.037(7) 0.056(8) -0.015(5) -0.005(6) 0.019(5) 
C53 0.081(12) 0.066(10) 0.069(10) 0.017(8) 0.003(8) 0.041(8) 
C54 0.049(9) 0.079(11) 0.111(15) -0.042(9) -0.017(9) 0.006(8) 
C55 0.074(11) 0.026(7) 0.079(9) -0.022(7) 0.020(8) 0.020(7) 
C56 0.029(5) 0.011(5) 0.024(6) 0.001(4) 0.009(4) -0.006(4) 
C57 0.022(5) 0.029(6) 0.037(6) 0.005(5) 0.003(5) 0.000(5) 
C58 0.036(7) 0.048(8) 0.058(8) 0.010(7) 0.003(6) -0.012(6) 
C59 0.030(7) 0.036(6) 0.061(9) -0.002(6) 0.004(6) -0.002(5) 
C60 0.030(7) 0.048(8) 0.043(6) 0.002(6) -0.005(5) 0.005(6) 
Cl1 0.0357(17) 0.0204(14) 0.0295(15) -0.0035(11) 0.0124(13) 0.0003(12) 
Cl2 0.084(3) 0.0288(17) 0.059(2) -0.0024(16) 0.043(2) 0.0000(17) 
C1A 0.15(2) 0.109(11) 0.34(3) -0.10(3) 0.10(2) -0.027(14) 
Cl1A 0.069(6) 0.113(6) 0.175(11) 0.028(7) -0.030(6) -0.026(4) 
Cl2A 0.202(10) 0.135(7) 0.381(16) -0.057(9) 0.131(11) 0.016(7) 
C1B 0.17(3) 0.13(3) 0.36(4) -0.09(3) 0.08(3) -0.02(2) 
Cl1B 0.10(2) 0.24(3) 0.30(4) -0.03(2) 0.05(2) 0.00(2) 
Cl2B 0.202(10) 0.135(7) 0.381(16) -0.057(9) 0.131(11) 0.016(7) 
Cl1C 0.294(14) 0.247(13) 0.233(12) 0.096(10) 0.089(10) 0.005(11) 
C1C 0.132(15) 0.26(2) 0.223(18) 0.047(16) 0.093(15) 0.003(13) 
Cl2C 0.150(14) 0.23(2) 0.25(2) 0.093(19) -0.028(13) -0.010(13) 
Cl1D 0.294(14) 0.247(13) 0.233(12) 0.096(10) 0.089(10) 0.005(11) 
C1D 0.132(15) 0.26(2) 0.223(18) 0.047(16) 0.093(15) 0.003(13) 
Cl2D 0.134(17) 0.29(3) 0.29(3) -0.06(2) 0.044(15) 0.031(18) 
C1E 0.17(3) 0.30(4) 0.14(2) -0.07(3) 0.062(19) -0.06(2) 
Cl1E 0.155(8) 0.50(2) 0.168(8) -0.116(11) 0.072(7) -0.138(11) 
Cl2E 0.191(9) 0.158(8) 0.273(12) 0.093(8) 0.128(9) 0.046(7) 
  
_geom_special_details 
; 
 All esds (except the esd in the dihedral angle between two l.s. planes) 
 are estimated using the full covariance matrix.  The cell esds are taken 
 into account individually in the estimation of esds in distances, angles 
 and torsion angles; correlations between esds in cell parameters are only 
 used when they are defined by crystal symmetry.  An approximate (isotropic) 
 treatment of cell esds is used for estimating esds involving l.s. planes. 
; 
  
loop_ 
 _geom_bond_atom_site_label_1 
 _geom_bond_atom_site_label_2 
 _geom_bond_distance 
 _geom_bond_site_symmetry_2 
 _geom_bond_publ_flag 
Au1 P1 2.314(3) . ? 
Au1 P3 2.316(3) . ? 
Au1 Rh1 2.9214(9) . ? 
Rh1 C56 1.937(11) . ? 
Rh1 C51 1.975(12) . ? 
Rh1 P2 2.314(3) . ? 
Rh1 P4 2.323(3) . ? 
P1 C1 1.792(10) . ? 
P1 C3 1.806(11) . ? 
P1 C9 1.812(11) . ? 
P2 C21 1.786(11) . ? 
P2 C15 1.815(10) . ? 
P2 C1 1.853(9) . ? 
P3 C27 1.809(10) . ? 
P3 C2 1.819(9) . ? 
P3 C33 1.827(10) . ? 
P4 C39 1.816(10) . ? 
P4 C45 1.822(10) . ? 
P4 C2 1.844(10) . ? 
N1 C51 1.128(14) . ? 
N1 C52 1.452(16) . ? 
N2 C56 1.170(14) . ? 
N2 C57 1.452(15) . ? 
C3 C4 1.373(17) . ? 
C3 C8 1.382(17) . ? 
C4 C5 1.399(19) . ? 
C5 C6 1.37(2) . ? 
C6 C7 1.37(2) . ? 
C7 C8 1.36(2) . ? 
C9 C14 1.387(15) . ? 
C9 C10 1.406(15) . ? 
C10 C11 1.393(15) . ? 
C11 C12 1.365(16) . ? 
C12 C13 1.374(16) . ? 
C13 C14 1.403(16) . ? 
C15 C16 1.374(15) . ? 
C15 C20 1.394(15) . ? 
C16 C17 1.370(16) . ? 
C17 C18 1.388(17) . ? 
C18 C19 1.358(17) . ? 
C19 C20 1.384(17) . ? 
C21 C26 1.399(15) . ? 
C21 C22 1.436(15) . ? 
C22 C23 1.347(18) . ? 
C23 C24 1.38(2) . ? 
C24 C25 1.366(19) . ? 
C25 C26 1.386(16) . ? 
C27 C28 1.400(14) . ? 
C27 C32 1.405(15) . ? 
C28 C29 1.388(16) . ? 
C29 C30 1.369(17) . ? 
C30 C31 1.368(16) . ? 
C31 C32 1.395(16) . ? 
C33 C38 1.388(15) . ? 
C33 C34 1.410(15) . ? 
C34 C35 1.360(16) . ? 
C35 C36 1.409(18) . ? 
C36 C37 1.377(18) . ? 
C37 C38 1.370(16) . ? 
C39 C44 1.383(15) . ? 
C39 C40 1.398(14) . ? 
C40 C41 1.373(15) . ? 
C41 C42 1.393(17) . ? 
C42 C43 1.375(17) . ? 
C43 C44 1.383(15) . ? 
C45 C50 1.387(14) . ? 
C45 C46 1.398(14) . ? 
C46 C47 1.363(15) . ? 
C47 C48 1.379(17) . ? 
C48 C49 1.378(17) . ? 
C49 C50 1.390(16) . ? 
C52 C55 1.477(19) . ? 
C52 C54 1.51(2) . ? 
C52 C53 1.56(2) . ? 
C57 C59 1.517(17) . ? 
C57 C60 1.540(17) . ? 
C57 C58 1.552(17) . ? 
C1A Cl2A 1.68(3) . ? 
C1A Cl1A 1.68(4) . ? 
C1B Cl1B 1.67(4) . ? 
Cl1C C1C 1.54(3) . ? 
C1C Cl2C 1.61(3) . ? 
C1E Cl1E 1.65(3) . ? 
C1E Cl2E 1.75(3) . ? 
  
loop_ 
 _geom_angle_atom_site_label_1 
 _geom_angle_atom_site_label_2 
 _geom_angle_atom_site_label_3 
 _geom_angle 
 _geom_angle_site_symmetry_1 
 _geom_angle_site_symmetry_3 
 _geom_angle_publ_flag 
P1 Au1 P3 173.01(10) . . ? 
P1 Au1 Rh1 93.35(7) . . ? 
P3 Au1 Rh1 92.37(7) . . ? 
C56 Rh1 C51 171.6(4) . . ? 
C56 Rh1 P2 90.7(3) . . ? 
C51 Rh1 P2 88.9(3) . . ? 
C56 Rh1 P4 90.0(3) . . ? 
C51 Rh1 P4 91.2(3) . . ? 
P2 Rh1 P4 174.99(10) . . ? 
C56 Rh1 Au1 91.1(3) . . ? 
C51 Rh1 Au1 80.6(3) . . ? 
P2 Rh1 Au1 92.22(7) . . ? 
P4 Rh1 Au1 92.73(7) . . ? 
C1 P1 C3 101.1(5) . . ? 
C1 P1 C9 112.1(5) . . ? 
C3 P1 C9 104.7(5) . . ? 
C1 P1 Au1 112.5(3) . . ? 
C3 P1 Au1 113.0(4) . . ? 
C9 P1 Au1 112.7(4) . . ? 
C21 P2 C15 101.3(5) . . ? 
C21 P2 C1 101.4(5) . . ? 
C15 P2 C1 108.4(5) . . ? 
C21 P2 Rh1 115.7(3) . . ? 
C15 P2 Rh1 116.2(4) . . ? 
C1 P2 Rh1 112.3(3) . . ? 
C27 P3 C2 101.8(5) . . ? 
C27 P3 C33 105.4(5) . . ? 
C2 P3 C33 109.2(5) . . ? 
C27 P3 Au1 116.3(3) . . ? 
C2 P3 Au1 112.9(3) . . ? 
C33 P3 Au1 110.7(3) . . ? 
C39 P4 C45 101.7(5) . . ? 
C39 P4 C2 109.2(5) . . ? 
C45 P4 C2 99.6(5) . . ? 
C39 P4 Rh1 115.7(4) . . ? 
C45 P4 Rh1 116.5(3) . . ? 
C2 P4 Rh1 112.6(3) . . ? 
C51 N1 C52 178.2(13) . . ? 
C56 N2 C57 179.3(11) . . ? 
P1 C1 P2 119.4(5) . . ? 
P3 C2 P4 117.4(5) . . ? 
C4 C3 C8 117.5(12) . . ? 
C4 C3 P1 122.0(9) . . ? 
C8 C3 P1 120.4(10) . . ? 
C3 C4 C5 121.7(13) . . ? 
C6 C5 C4 118.5(14) . . ? 
C7 C6 C5 120.5(14) . . ? 
C8 C7 C6 119.8(14) . . ? 
C7 C8 C3 122.0(14) . . ? 
C14 C9 C10 119.1(10) . . ? 
C14 C9 P1 119.0(8) . . ? 
C10 C9 P1 121.5(8) . . ? 
C11 C10 C9 119.6(11) . . ? 
C12 C11 C10 120.0(10) . . ? 
C11 C12 C13 121.9(11) . . ? 
C12 C13 C14 118.6(11) . . ? 
C9 C14 C13 120.7(10) . . ? 
C16 C15 C20 118.7(10) . . ? 
C16 C15 P2 123.1(8) . . ? 
C20 C15 P2 118.2(8) . . ? 
C17 C16 C15 121.6(11) . . ? 
C16 C17 C18 119.4(11) . . ? 
C19 C18 C17 119.7(11) . . ? 
C18 C19 C20 121.1(11) . . ? 
C19 C20 C15 119.4(11) . . ? 
C26 C21 C22 116.4(10) . . ? 
C26 C21 P2 123.8(8) . . ? 
C22 C21 P2 119.9(8) . . ? 
C23 C22 C21 121.6(12) . . ? 
C22 C23 C24 120.7(13) . . ? 
C25 C24 C23 119.6(12) . . ? 
C24 C25 C26 121.1(12) . . ? 
C25 C26 C21 120.6(11) . . ? 
C28 C27 C32 118.6(10) . . ? 
C28 C27 P3 122.3(8) . . ? 
C32 C27 P3 119.1(8) . . ? 
C29 C28 C27 121.0(10) . . ? 
C30 C29 C28 119.3(10) . . ? 
C29 C30 C31 121.2(11) . . ? 
C30 C31 C32 120.7(11) . . ? 
C31 C32 C27 119.2(10) . . ? 
C38 C33 C34 119.6(10) . . ? 
C38 C33 P3 123.2(8) . . ? 
C34 C33 P3 117.2(8) . . ? 
C35 C34 C33 120.8(11) . . ? 
C34 C35 C36 119.0(12) . . ? 
C37 C36 C35 120.0(11) . . ? 
C38 C37 C36 121.2(11) . . ? 
C37 C38 C33 119.4(11) . . ? 
C44 C39 C40 119.0(9) . . ? 
C44 C39 P4 118.2(8) . . ? 
C40 C39 P4 122.3(8) . . ? 
C41 C40 C39 120.5(11) . . ? 
C40 C41 C42 119.6(11) . . ? 
C43 C42 C41 120.3(11) . . ? 
C42 C43 C44 119.8(11) . . ? 
C39 C44 C43 120.7(10) . . ? 
C50 C45 C46 118.3(10) . . ? 
C50 C45 P4 120.6(8) . . ? 
C46 C45 P4 120.9(8) . . ? 
C47 C46 C45 120.5(10) . . ? 
C46 C47 C48 120.5(11) . . ? 
C49 C48 C47 120.6(11) . . ? 
C48 C49 C50 118.8(11) . . ? 
C45 C50 C49 121.3(10) . . ? 
N1 C51 Rh1 173.8(10) . . ? 
N1 C52 C55 109.9(12) . . ? 
N1 C52 C54 105.1(11) . . ? 
C55 C52 C54 115.4(15) . . ? 
N1 C52 C53 105.1(12) . . ? 
C55 C52 C53 110.4(12) . . ? 
C54 C52 C53 110.4(14) . . ? 
N2 C56 Rh1 176.1(10) . . ? 
N2 C57 C59 107.6(10) . . ? 
N2 C57 C60 106.8(10) . . ? 
C59 C57 C60 111.8(11) . . ? 
N2 C57 C58 107.9(10) . . ? 
C59 C57 C58 111.7(11) . . ? 
C60 C57 C58 110.9(10) . . ? 
Cl2A C1A Cl1A 121(2) . . ? 
Cl1C C1C Cl2C 119(3) . . ? 
Cl1E C1E Cl2E 111(2) . . ? 
  
_diffrn_measured_fraction_theta_max    0.996 
_diffrn_reflns_theta_full              23.29 
_diffrn_measured_fraction_theta_full   0.996 
_refine_diff_density_max    2.358 
_refine_diff_density_min   -2.003 
_refine_diff_density_rms    0.177 
